# Supplementary material for: Rurality and relative poverty drive acquisition of a stable and diverse gut microbiome in early childhood in a non-industrialized setting
Source: Springer Nature journal article supplement (doi:10.1038/s41598-025-89224-5), 2025-02-15
Supplement: MOESM2 [file 41598_2025_89224_MOESM2_ESM.xls]

## Sheet: Sheet1
daycare_any_36m	urbanrural	crowdinggp	houseconst	potwater	maternal_antibiotics	vaginaldelivery	antiparasite_	bano_	pigs_	dog_	real_age_months	id	real_age_months2	gender	mothanyhel_b	matgoods_bin	sthany_household	geo_any_	canast_basic_fam_2007	traditional_cat	breakfast_cat	vegefat_cat	sweets_cat	birthorder_bin	exclusive_breastfeeding_age	family_diet_age	ses_bin	materneducstatus_bin	fridgebirth	al_any_	tt_any_	cows_filled	horse_filled	unpast_milk3_filled	beta
0	2	1	1	0	0	2		1	1	0	12	1	144	2	1	0	1	1	0					2	3	3	1	1	0	0	1	0	0	1
0	2	1	1	0	0	1		1	1	0	43	2	1849	1	1	0	1	1	0	0	1	1	1	2	6	6	1	1		1	1
0	1	1	1	0	1	1	0	1	0		16	3	256	1	0	0	1	1	0	0	0	1	1	2	6	6	2	1	0	1	0	0	0	2
0	1	1	1	0	1	1	1	1	1		29	3	841	1	0	0	1	1	0	0	0	1	1	2	6	6	2	1	0	1	1	0	0	1	0.67509
0	1	1	1	0	1	1		1	1	0	31	3	961	1	0	0	1	1	0	0	0	1	1	2	6	6	2	1	0	1	1				0.539888
0	1	1	1	0	1	1	1	1	0	0	64	3	4096	1	0	0	1	0	0	0	0	1	1	2	6	6	2	1	0	0	0	0	0	1	0.667357
0	2	1	1	0	1	1	1	1	1	0	27	4	729	2	1	0	1	1	0	1	0	1	1	2	7	7	1	2	0	1	0	0	0	1
0	2	1	1	0	1	1	1	2	1	0	26	5	676	1	0	0	0	0	0	0	0	1	1	1	4	4	1	2	0	0	0	0	0	1
0	2	0	1	0	0	1	1	1	1	0	25	6	625	2	1	0	1	1	0	1	1	1	1	2	6	6	1	2	0	1	1	1	1	2
0	2	0	1	0	0	1		1	0	0	20	7	400	2	0	0	0	0	0					1	7	7	1	1		0	0
0	1	0	2	1	0	1	0	1	1	0	4	8	16	2	1	0	1	0	0	1	1	1	1	1	5	6	1	2	0	0	0	0	0	1	0.660519
0	1	0	2	1	0	1	0	1	0	0	7	8	49	2	1	0	1	0	0	1	1	1	1	1	5	6	1	2	0	0	0	0	0	1	0.56801
0	1	0	2	1	0	1	1	1	0	0	15	8	225	2	1	0	1	0	0	1	1	1	1	1	5	6	1	2	0	0	0	0	1	2	0.782977
0	1	0	2	1	0	1	1	1	0	0	25	8	625	2	1	0	1	1	0	1	1	1	1	1	5	6	1	2	0	1	0	0	1	1	0.744475
0	1	0	2	1	0	1	1	2	0		65	8	4225	2	1	0	1	1	0	1	1	1	1	1	5	6	1	2	0	0	1	0	0	1	0.669932
1	1	0	2	1	1	1	0	2	0	0	7	9	49	2	0	0	0	0	0	0	0	1	1	1	4	6	2	2	1	0	0	0	0	1	0.831291
1	1	0	2	1	1	1	0	2	0	0	27	9	729	2	0	0	0	0	0	0	0	1	1	1	4	6	2	2	1	0	0	0	0	2	0.677063
1	1	0	2	1	1	1	0	2	0	0	41	9	1681	2	0	0	0	0	0	0	0	1	1	1	4	6	2	2	1	0	0	0	0	1	0.526095
1	1	0	2	1	1	1	0	2	0		58	9	3364	2	0	0	0	0	0	0	0	1	1	1	4	6	2	2	1	0	0	0	0	1	0.423553
1	2	0	1	0	1	1	1	1	0	0	14	10	196	2	1	0	1	0	0	1	0	1	1	2	6	6	1	2	0	0	0	0	0	2	0.844372
1	2	0	1	0	1	1	1	1	1	0	24	10	576	2	1	0	1	1	0	1	0	1	1	2	6	6	1	2	0	1	1	0	0	1	0.445605
1	2	0	1	0	1	1	1	1	0	0	36	10	1296	2	1	0	1	0	0	1	0	1	1	2	6	6	1	2	0	0	0	0	0	2	0.53315
1	2	0	1	0	1	1	1	1	0	0	58	10	3364	2	1	0	1	0	0	1	0	1	1	2	6	6	1	2	0	0	0	0	0	1	0.534763
0	1	0	2	0	0	1	0	1	0	0	3	11	9	1	0	0	1	0	0	0	1	1	1	1	2	6	2	2	0	0	0	0	0	1
0	1	0	2	0	0	1	0	1	0	0	7	11	49	1	0	0	1	0	0	0	1	1	1	1	2	6	2	2	0	0	0	0	0	1	0.828258
0	1	0	2	0	0	1	0	1	0	0	13	11	169	1	0	0	1	0	0	0	1	1	1	1	2	6	2	2	0	0	0	0	0	2	0.607766
0	1	0	2	0	0	1	0	1	0	0	24	11	576	1	0	0	1	0	0	0	1	1	1	1	2	6	2	2	0	0	0	0	0	2	0.839452
0	1	0	2	0	0	1	1	2	0	0	36	11	1296	1	0	0	1	0	0	0	1	1	1	1	2	6	2	2	0	0	0	0	0	2	0.559702
0	1	0	2	0	0	1	1	2	0	0	60	11	3600	1	0	0	1	0	0	0	1	1	1	1	2	6	2	2	0	0	0	0	0	1	0.498845
0	1	0	2	0	1	2	0	1	0	0	3	12	9	1	1	0	0	0	0	0	1	0	0	1	5	6	2	2	0	0	0	0	0	0	0.653935
0	1	0	2	0	1	2	0	1	0	0	8	12	64	1	1	0	0	0	0	0	1	0	0	1	5	6	2	2	0	0	0	0	0	0	0.686488
0	1	0	2	0	1	2	1	1	0	0	14	12	196	1	1	0	0	0	0	0	1	0	0	1	5	6	2	2	0	0	0	0	0	1	0.750686
0	1	0	2	0	1	2	1	1	0	0	26	12	676	1	1	0	0	0	0	0	1	0	0	1	5	6	2	2	0	0	0	0	0	1	0.777518
0	1	0	2	0	1	2	1	2	0	0	41	12	1681	1	1	0	0	0	0	0	1	0	0	1	5	6	2	2	0	0	0	0	0	1	0.477748
0	1	0	2	0	1	2	1	2	0	0	68	12	4624	1	1	0	0	0	0	0	1	0	0	1	5	6	2	2	0	0	0	0	0	1	0.651523
0	2	1	2	1		1	0	1	1	0	3	13	9	1	0	0	1	0	0	0	0	0	1	1	4	4	1	2	0	0	0	0	0	1	0.715439
0	2	1	2	1		1	0	1	1	0	7	13	49	1	0	0	1	0	0	0	0	0	1	1	4	4	1	2	0	0	0	0	0	1	0.715669
0	2	1	2	1		1	0	1	1	0	13	13	169	1	0	0	1	0	0	0	0	0	1	1	4	4	1	2	0	0	0	0	0	2	0.758052
0	2	1	2	1		1	1	1	1	0	25	13	625	1	0	0	1	0	0	0	0	0	1	1	4	4	1	2	0	0	0	0	0	2	0.740245
0	2	1	2	1		1	1	1	0	0	36	13	1296	1	0	0	1	0	0	0	0	0	1	1	4	4	1	2	0	0	0	0	0	1	0.657805
0	2	1	2	1		1	1	2	1	0	61	13	3721	1	0	0	1	0	0	0	0	0	1	1	4	4	1	2	0	0	0	0	0	1	0.646724
0	1	0	2	1	1	1	0	1	0	0	3	14	9	1	0	0	0	0	0	1	1	0	0	1	6	6	2	2	0	0	0	0	0	0	0.833823
0	1	0	2	1	1	1	0	1	0	0	8	14	64	1	0	0	0	0	0	1	1	0	0	1	6	6	2	2	0	0	0	0	0	0	0.674206
0	1	0	2	1	1	1	1	1	0	0	14	14	196	1	0	0	0	0	0	1	1	0	0	1	6	6	2	2	0	0	0	0	0	0	0.722621
0	1	0	2	1	1	1	1	1	0	0	25	14	625	1	0	0	0	0	0	1	1	0	0	1	6	6	2	2	0	0	0	0	0	1	0.884282
0	1	0	2	1	1	1	0	2	0	0	37	14	1369	1	0	0	0	0	0	1	1	0	0	1	6	6	2	2	0	0	0	0	0	1	0.441743
0	1	0	2	1	1	1	1	2	0	0	60	14	3600	1	0	0	0	0	0	1	1	0	0	1	6	6	2	2	0	0	0	0	0	1	0.455148
0	2	1	1	0		1	1	1	1	0	24	15	576	1	0	0	0	0	0	1	0	1	1	2	5	5	1	2	0	0	0	0	1	1
0	2	1	1	0	0	1	1	1	0		27	16	729	2	0	0	0	0	0					2	7	7	1	1	0	0	0	0	0	2
0	1	1	2	1	1	1	0	2	0	0	3	17	9	2	0	1	0	0	0					2	3	3	2	2	1	0	0				0.668762
0	1	1	2	1	1	1	0	2	0	0	25	17	625	2	0	1	0	0	0					2	3	3	2	2	1	0	0	0	0	2	0.80338
0	1	1	2	1	1	1	0	2	0	0	37	17	1369	2	0	1	0	0	0					2	3	3	2	2	1	0	0	0	0	1	0.559078
0	1	1	2	1	1	1	1	2	0		60	17	3600	2	0	1	0	0	0					2	3	3	2	2	1	0	0	0	0	1	0.590905
0	2	1	1	0	0	1	0	1	0		28	18	784	2	1	0	1	1	0	1	0	1	1	2	5	5	1	2	0	1	0	0	0	1
1	2	1	1	0	0	1	0	1	0	1	2	19	4	2	1	0	1	0	0	1	0	0	0	2	2	12	1	2	0	0	0	0	1	1	0.838008
1	2	1	1	0	0	1	0	1	1	1	8	19	64	2	1	0	1	0	0	1	0	0	0	2	2	12	1	2	0	0	0	0	1	1	0.789059
1	2	1	1	0	0	1	0	1	1	1	13	19	169	2	1	0	1	1	0	1	0	0	0	2	2	12	1	2	0	1	0	0	0	2	0.580078
1	2	1	1	0	0	1	1	1	0	1	29	19	841	2	1	0	1	1	0	1	0	0	0	2	2	12	1	2	0	1	1	0	1	2	0.656969
1	2	1	1	0	0	1	1	1	0	1	36	19	1296	2	1	0	1	1	0	1	0	0	0	2	2	12	1	2	0	0	1	0	0	1	0.503042
1	2	1	1	0	0	1	1	2	0	1	61	19	3721	2	1	0	1	1	0	1	0	0	0	2	2	12	1	2	0	1	0	0	0	1	0.735387
0	1	0	2	0	1	2	1	1	0	0	8	20	64	1	1	0	1	0	0	1	0	1	1	2	6	6	2	2	1	0	0	0	0	1	0.648359
0	1	0	2	0	1	2	1	1	0	0	15	20	225	1	1	0	1	0	0	1	0	1	1	2	6	6	2	2	1	0	0	0	0	2	0.699438
0	1	0	2	0	1	2	1	1	0		27	20	729	1	1	0	1	1	0	1	0	1	1	2	6	6	2	2	1	1	1	0	0	0	0.574618
0	1	0	2	0	1	2	0	2	0	0	36	20	1296	1	1	0	1	1	0	1	0	1	1	2	6	6	2	2	1	0	1	0	0	1	0.483218
0	1	0	2	0	1	2	1	2	0	0	63	20	3969	1	1	0	1	1	0	1	0	1	1	2	6	6	2	2	1	0	1	0	0	1	0.479385
0	1	1	2	0	1	1	0	2	0	1	7	21	49	1	0	1	0	0	0					2	6	6	2	2	1	0	0	0	0	1	0.676556
0	1	1	2	0	1	1	0	2	0		16	21	256	1	0	1	0	0	0					2	6	6	2	2	1	0	0	0	0	2	0.781011
0	1	1	2	0	1	1	1	2	0	1	25	21	625	1	0	1	0	0	0					2	6	6	2	2	1	0	0	0	0	1	0.694633
0	1	1	2	0	1	1	0	2	0	1	36	21	1296	1	0	1	0	0	0					2	6	6	2	2	1	0	0	0	0	1	0.505162
0	1	1	2	0	1	1	0	2	0	1	67	21	4489	1	0	1	0	0	0					2	6	6	2	2	1	0	0	0	0	1	0.503423
0	1	1	1	0	0	1	0	1	0	0	3	22	9	1	0	1	0	0	0	1	0	1	1	2	5	5	1	2	1	0	0	0	0	0	0.826906
0	1	1	1	0	0	1	0	1	0	0	8	22	64	1	0	1	0	0	0	1	0	1	1	2	5	5	1	2	1	0	0	0	0	0	0.511778
0	1	1	1	0	0	1	0	1	0	0	15	22	225	1	0	1	0	0	0	1	0	1	1	2	5	5	1	2	1	0	0	0	0	2	0.685926
0	1	1	1	0	0	1	1	1	0	0	25	22	625	1	0	1	0	0	0	1	0	1	1	2	5	5	1	2	1	0	0	0	0	0	0.669891
0	1	1	1	0	0	1	1	2	0	0	36	22	1296	1	0	1	0	0	0	1	0	1	1	2	5	5	1	2	1	0	0	0	0	1	0.539769
0	1	1	1	0	0	1	1	2	0	0	60	22	3600	1	0	1	0	0	0	1	0	1	1	2	5	5	1	2	1	0	0	0	0	1	0.563489
0	1	1	1	1	0	1	0	1	0	0	9	23	81	2	0	0	1	0	0	1	0	1	1	2	3	6	1	1	0	0	0	0	0	0
0	1	1	1	1	0	1	0	1	0	0	14	23	196	2	0	0	1	0	0	1	0	1	1	2	3	6	1	1	0	0	0	0	0	0	0.551551
0	1	1	1	1	0	1	1	1	0	0	26	23	676	2	0	0	1	0	0	1	0	1	1	2	3	6	1	1	0	0	0	0	0	0	0.63235
0	1	1	1	1	0	1	1	2	1	0	63	23	3969	2	0	0	1	0	0	1	0	1	1	2	3	6	1	1	0	0	0	0	0	2	0.739494
0	1	1	2	0		1	0	2	0	0	8	24	64	1	0	1	0	0	0	0	1	0	1	2	6	6	2	1	1	0	0	0	0	1	0.639652
0	1	1	2	0		1	0	2	0		16	24	256	1	0	1	0	0	0	0	1	0	1	2	6	6	2	1	1	0	0	0	0	0	0.640187
0	1	1	2	0		1	1	2	0	0	25	24	625	1	0	1	0	0	0	0	1	0	1	2	6	6	2	1	1	0	0	0	0	1	0.511845
0	1	1	2	0		1	1	2	0	0	60	24	3600	1	0	1	0	0	0	0	1	0	1	2	6	6	2	1	1	0	0	0	0	1	0.637059
1	1	0	2	0	0	1	0	1	0	0	3	25	9	2	1	1	0	0	0	0	1	0	1	2	4	7	2	2	1	0	0	0	0	0	0.649032
1	1	0	2	0	0	1	0	1	0	0	9	25	81	2	1	1	0	0	0	0	1	0	1	2	4	7	2	2	1	0	0	0	0	0	0.626602
1	1	0	2	0	0	1	0	1	0	0	14	25	196	2	1	1	0	0	0	0	1	0	1	2	4	7	2	2	1	0	0	0	0	0	0.734886
1	1	0	2	0	0	1	1	1	0	0	26	25	676	2	1	1	0	0	0	0	1	0	1	2	4	7	2	2	1	0	0	0	0	1	0.555988
1	1	0	2	0	0	1	1	2	0	0	37	25	1369	2	1	1	0		0	0	1	0	1	2	4	7	2	2	1			0	0	1	0.621516
1	1	0	2	0	0	1	1	2	0	0	60	25	3600	2	1	1	0	0	0	0	1	0	1	2	4	7	2	2	1	0	0	0	0	1	0.421432
0	2	1	1	0	1	2	1	2	1	0	24	26	576	1	0	0	1	0	0					1	5	9	1	2	0	0	0	0	0	0
0	2	1	1	0	0	1	1	1	0		28	27	784	1	1	0	1	0	0					2	7	9	1	1	0	0	0	0	0	1
0	2	1	2	0	0	1	0	1	1	0	3	28	9	1	1	0	0	0	0	0	1	0	0	1	6	6	2	2	1	0	0	0	0	0	0.892341
0	2	1	2	0	0	1	0	1	1	0	8	28	64	1	1	0	0	0	0	0	1	0	0	1	6	6	2	2	1	0	0	0	0	0	0.707551
0	2	1	2	0	0	1	0	1	1	0	13	28	169	1	1	0	0	0	0	0	1	0	0	1	6	6	2	2	1	0	0	0	0	2	0.733257
0	2	1	2	0	0	1	1	1	1	0	24	28	576	1	1	0	0	1	0	0	1	0	0	1	6	6	2	2	1	1	0	0	0	2	0.722053
0	2	1	2	0	0	1	1	1	0	0	36	28	1296	1	1	0	0	0	0	0	1	0	0	1	6	6	2	2	1	0	0	0	0	2	0.592069
0	2	1	2	0	0	1	1	2	0	0	60	28	3600	1	1	0	0	0	0	0	1	0	0	1	6	6	2	2	1	0	0	0	0	2	0.42797
0	1	1	1	0	1	2	0	1	1	0	9	29	81	1	0	1	1	0	0	0	0	0	1	2	3	5	2	2	1	0	0	0	0	1	0.859865
0	1	1	1	0	1	2	1	1	1	0	26	29	676	1	0	1	1	0	0	0	0	0	1	2	3	5	2	2	1	0	0	0	0	1	0.803849
0	1	1	1	0	1	2	0	2	0	0	60	29	3600	1	0	1	1	0	0	0	0	0	1	2	3	5	2	2	1	0	0	0	0	1	0.463179
0	2	1	1	0	0	1	1	1	1	0	24	30	576	2	0	0	1	0	0	1	0	1	0	1	5	9	1	2	0	0	0	1	1	2
0	2	0	2	0	0	1	0	1	1	0	13	31	169	2	0	1	0	0	0	0	0	1	0	1	5	6	2	2	1	0	0	1	1	2	0.806488
0	2	0	2	0	0	1	1	1	1	0	26	31	676	2	0	1	0	0	0	0	0	1	0	1	5	6	2	2	1	0	0	1	1	2	0.593611
0	2	0	2	0	0	1	1	2	0	0	60	31	3600	2	0	1	0	0	0	0	0	1	0	1	5	6	2	2	1	0	0	0	0	1	0.438863
1	1	0	1	0	1	1	0	1	0	0	4	32	16	1	1	0	1	0		0	0	0	1	1	4	4	1	1	0	0	0	0	0	0	0.586449
1	1	0	1	0	1	1	0	1	0	0	7	32	49	1	1	0	1	0		0	0	0	1	1	4	4	1	1	0	0	0	0	0	0	0.441718
1	1	0	1	0	1	1	1	1	0		16	32	256	1	1	0	1	0		0	0	0	1	1	4	4	1	1	0	0	0	0	0	0	0.793186
1	1	0	1	0	1	1	1	1	0	0	25	32	625	1	1	0	1	0		0	0	0	1	1	4	4	1	1	0	0	0	0	0	2	0.838106
1	1	0	1	0	1	1	0	2	0	0	61	32	3721	1	1	0	1	0		0	0	0	1	1	4	4	1	1	0	0	0	0	0	1	0.793535
0	1	0	2	1	1	1	0	1	0	0	15	33	225	1	1	1	0	0	0	0	1	0	0	1	0	7	2	2	1	0	0	0	0	0	0.735703
0	1	0	2	1	1	1	1	1	0	0	27	33	729	1	1	1	0		0	0	1	0	0	1	0	7	2	2	1			0	0	2	0.684496
0	1	0	2	1	1	1	1	2	0	0	64	33	4096	1	1	1	0		0	0	1	0	0	1	0	7	2	2	1			0	0	1	0.468586
0	1	1	1	0	1	2	1	1	1	0	24	34	576	2	1	0	1	0	0	0	1	0	0	2	1	12	1	2	0	0	0	0	0	1
0	1	1	1	0	1	2	1	2	0	0	61	34	3721	2	1	0	1	0	0	0	1	0	0	2	1	12	1	2	0	0	0	0	0	1	0.696806
0	2	0	2	0	0	2	0	1	1	0	8	35	64	1	1	0		0	0	0	0	0	0	1	1	7	2	2	0	0	0	0	0	1	0.745276
0	2	0	2	0	0	2	1	1	0	0	14	35	196	1	1	0		0	0	0	0	0	0	1	1	7	2	2	0	0	0	0	0	2	0.740408
0	2	0	2	0	0	2	1	1	1	0	26	35	676	1	1	0		0	0	0	0	0	0	1	1	7	2	2	0	0	0	0	0	2	0.567268
0	2	0	2	0	0	2	1	2	0	0	60	35	3600	1	1	0		0	0	0	0	0	0	1	1	7	2	2	0	0	0	0	0	1	0.464891
0	1	1	2	0	1	1	0	1	0	0	4	36	16	2	1	1	0	0	1	0	0	1	1	2	4	6	2	2	1	0	0	0	0	1	0.815058
0	1	1	2	0	1	1	0	1	0	0	7	36	49	2	1	1	0	0	1	0	0	1	1	2	4	6	2	2	1	0	0	0	0	1	0.678421
0	1	1	2	0	1	1	0	1	0	0	14	36	196	2	1	1	0	0	1	0	0	1	1	2	4	6	2	2	1	0	0	0	0	1	0.622893
0	1	1	2	0	1	1	1	1	0	0	26	36	676	2	1	1	0	0	1	0	0	1	1	2	4	6	2	2	1	0	0	0	0	2	0.81291
0	1	1	2	0	1	1	1	2	0	0	36	36	1296	2	1	1	0	0	1	0	0	1	1	2	4	6	2	2	1	0	0	0	0	1	0.555167
0	1	1	2	0	1	1	1	2	0	0	60	36	3600	2	1	1	0	0	1	0	0	1	1	2	4	6	2	2	1	0	0	0	0	1	0.65732
0	1	0	2	1	1	2	0	1	1	0	3	37	9	1	1	0	1	0	0	0	1	0	0	2	1	6	2	2	0	0	0	0	0	0	0.588692
0	1	0	2	1	1	2	0	1	0	0	7	37	49	1	1	0	1	0	0	0	1	0	0	2	1	6	2	2	0	0	0	0	0	0	0.492539
0	1	0	2	1	1	2	0	1	1	0	13	37	169	1	1	0	1	0	0	0	1	0	0	2	1	6	2	2	0	0	0	0	0	0	0.750581
0	1	0	2	1	1	2	1	1	0	0	25	37	625	1	1	0	1	1	0	0	1	0	0	2	1	6	2	2	0	1	0	0	0	2	0.545487
0	1	0	2	1	1	2	1	1	0	0	61	37	3721	1	1	0	1	0	0	0	1	0	0	2	1	6	2	2	0	0	0	0	0	2	0.511003
0	1	1	2	1	1	2	0	1	1	0	13	38	169	2	1	0		1	0	1	1	1	0	2	3	6	2	2	1	0	1	0	0	0
0	1	1	2	1	1	2	1	1	1	0	24	38	576	2	1	0		1	0	1	1	1	0	2	3	6	2	2	1	0	1	0	0	1	0.572005
0	1	1	2	1	1	2	1	2	1	0	60	38	3600	2	1	0		0	0	1	1	1	0	2	3	6	2	2	1	0	0	0	0	2	0.430845
0	1	1	2	0	1	1	0	1	0	0	26	39	676	1	0	0	0	0	0	1	1	0	0	2	6	10	2	2	1	0	0	0	0	1
1	1	1	2	0	1	1	0	2	0	0	3	40	9	2	0	0	1	0		0	0	1	1	2	0	6	2	2	1	0	0				0.577905
1	1	1	2	0	1	1	0	2	0	0	13	40	169	2	0	0	1	0		0	0	1	1	2	0	6	2	2	1	0	0	0	0	2	0.622183
1	1	1	2	0	1	1	0	2	0	0	24	40	576	2	0	0	1	0		0	0	1	1	2	0	6	2	2	1	0	0	0	0	1	0.836567
1	1	1	2	0	1	1	1	2	0	0	36	40	1296	2	0	0	1	0		0	0	1	1	2	0	6	2	2	1	0	0	0	0	1	0.687466
0	1	0	2	1	1	1	1	2	0	0	60	41	3600	2	0	1		1	0	1	0	1	0	1	7	7	2	2	1	1	1	0	0	1
0	2	0	2	0	0	2	0	1	0		12	42	144	2	0	1	1	0	0	0	0	1	0	2	1	8	2	2	1	0	0	0	0	1	0.688895
0	2	0	2	0	0	2	0	1	0	0	13	42	169	2	0	1	1	1	0	0	0	1	0	2	1	8	2	2	1	1	0	0	0	1	0.537262
0	2	0	2	0	0	2	1	1	1	0	24	42	576	2	0	1	1	1	0	0	0	1	0	2	1	8	2	2	1	1	0	0	0	1	0.561787
0	2	0	2	0	0	2	1	2	0	0	37	42	1369	2	0	1	1	0	0	0	0	1	0	2	1	8	2	2	1	0	0	0	0	2	0.654579
0	2	0	2	0	0	2	1	2	1	0	62	42	3844	2	0	1	1	0	0	0	0	1	0	2	1	8	2	2	1	0	0	0	0	1	0.754934
0	2	1	2	0	1	1	0	1	0	1	3	43	9	2	1	1		0	0	0	1	0	1	1	6	7	2	2	1	0	0	0	0	0	0.770086
0	2	1	2	0	1	1	0	1	0	1	7	43	49	2	1	1		0	0	0	1	0	1	1	6	7	2	2	1	0	0	0	0	0	0.618423
0	2	1	2	0	1	1	0	1	0	1	14	43	196	2	1	1		0	0	0	1	0	1	1	6	7	2	2	1	0	0	0	1	1	0.641554
0	2	1	2	0	1	1	0	1	0	1	24	43	576	2	1	1		1	0	0	1	0	1	1	6	7	2	2	1	0	1	0	0	1	0.883521
0	2	1	2	0	1	1	1	2	0	1	38	43	1444	2	1	1		0	0	0	1	0	1	1	6	7	2	2	1	0	0	0	0	1	0.681011
0	2	1	2	0	1	1	1	1	1	1	60	43	3600	2	1	1		1	0	0	1	0	1	1	6	7	2	2	1	0	1	0	0	2	0.642143
0	1	1	1	1	0	1	0	2	0	0	14	44	196	1	1	0		0	0	1	1	0	1	2	0	6	2	2	0	0	0	0	0	1
0	1	1	1	1	0	1	1	1	0	0	25	44	625	1	1	0		1	0	1	1	0	1	2	0	6	2	2	0	1	0	0	0	1	0.76213
0	1	1	1	1	0	1	1	2	0	0	60	44	3600	1	1	0		1	0	1	1	0	1	2	0	6	2	2	0	1	0	0	0	1	0.589014
0	2	1	1	0	0	2	1	1	0	0	24	45	576	1	1	0	1	0	0	0	0	0	0	2	3	5	1	1	0	0	0	0	0	1
0	2	0	1	0	1	2		1	0	0	19	46	361	2	1	0	1	0	0	0	1	1	0	1	6	6	1	2		0	0
0	1	0	1	0	0	1	0	1	0	0	5	47	25	1	1	0	1	0	0					1	5	5	1	2	0	0	0				0.645299
0	1	0	1	0	0	1	0	1	0	0	12	47	144	1	1	0	1	0	0					1	5	5	1	2	0	0	0	0	0	1	0.741143
0	1	0	1	0	0	1	1	1	0		27	47	729	1	1	0	1	0	0					1	5	5	1	2	0	0	0	0	0	1	0.837699
0	1	0	1	0	0	1	1	1	0	0	37	47	1369	1	1	0	1	0	0					1	5	5	1	2	0	0	0	0	0	1	0.641421
0	1	0	1	0	0	1	0	1	1	0	60	47	3600	1	1	0	1	0	0					1	5	5	1	2	0	0	0	0	0	1	0.605329
0	2	1	2	0	1	1	0	1	0	0	13	48	169	2	1	0		1	0	1	0	1	1	2	5	5	2	2	1	1	1	0	0	0
0	2	1	2	0	1	1	1	1	0	0	24	48	576	2	1	0		1	0	1	0	1	1	2	5	5	2	2	1	1	1	0	0	1	0.750522
0	2	1	2	0	1	1	1	1	1	0	36	48	1296	2	1	0		1	0	1	0	1	1	2	5	5	2	2	1	1	1	0	0	1	0.637453
0	2	1	2	0	1	1	1	2	1	0	60	48	3600	2	1	0		1	0	1	0	1	1	2	5	5	2	2	1	0	1	0	1	1	0.44947
0	2	1	1	0	0	1	0	1	0		17	49	289	2	0	0	0	0	0					1	8	8	1	2	0	0	0	0	0	2
0	2	1	1	0	0	1	1	1	0	0	25	49	625	2	0	0	0	1	0					1	8	8	1	2	0	1	0	0	0	2	0.502425
0	2	1	1	0	0	1	1	1	1		64	49	4096	2	0	0	0	0	0					1	8	8	1	2	0	0	0	1	0	2	0.597466
0	2	0	2	0	0	1	0	1	1	0	4	50	16	1	0	1	0	0	1	1	1	0	0	2	3	8	2	2	1	0	0				0.472609
0	2	0	2	0	0	1	0	1	1	0	13	50	169	1	0	1	0	0	1	1	1	0	0	2	3	8	2	2	1	0	0	0	1	1	0.711002
0	2	0	2	0	0	1	1	1	0	0	25	50	625	1	0	1	0	0	1	1	1	0	0	2	3	8	2	2	1	0	0	0	0	1	0.686344
0	2	0	2	0	0	1	1	2	1	0	62	50	3844	1	0	1	0	0	1	1	1	0	0	2	3	8	2	2	1	0	0	0	1	1	0.750725
0	2	0	2	1	0	1	0	1	0	0	14	51	196	1	0	1	1	0		1	0	0	1	1	0	6	2	2	1	0	0	0	0	2	0.907109
0	2	0	2	1	0	1	0	1	0	0	24	51	576	1	0	1	1	0		1	0	0	1	1	0	6	2	2	1	0	0	0	0	1	0.794885
0	2	0	2	1	0	1	0	1	0	0	40	51	1600	1	0	1	1	0		1	0	0	1	1	0	6	2	2	1	0	0	0	0	1	0.592753
0	2	0	2	1	0	1	1	2	1	0	63	51	3969	1	0	1	1	0		1	0	0	1	1	0	6	2	2	1	0	0	0	1	2	0.568976
0	2	0	2	0	1	1	0	1	0	0	8	52	64	1	1	1	1	0	0	0	1	1	0	1	4	4	2	1	0	0	0	0	0	0	0.612551
0	2	0	2	0	1	1	0	1	0	0	14	52	196	1	1	1	1	0	0	0	1	1	0	1	4	4	2	1	0	0	0	0	0	2	0.574166
0	2	0	2	0	1	1	0	1	0	0	24	52	576	1	1	1	1	0	0	0	1	1	0	1	4	4	2	1	0	0	0	0	0	0	0.647254
0	2	0	2	0	1	1	1	2	0	0	37	52	1369	1	1	1	1	0	0	0	1	1	0	1	4	4	2	1	0	0	0	0	0	1	0.501477
0	2	0	2	0	1	1	1	2	0	0	60	52	3600	1	1	1	1	1	0	0	1	1	0	1	4	4	2	1	0	1	0	0	1	0	0.551358
0	2	1	1	0	1	1	0	1	0	0	14	53	196	1	1	0	1	1	0					2	7	7	1	1	0	1	0	0	0	0
1	1	0	2	1	0	1	0	2	0	0	13	54	169	1	0	0	0	0	0	1	0	1	0	1	6	6	2	2	0	0	0	0	0	2	0.730889
1	1	0	2	1	0	1	1	2	0	0	24	54	576	1	0	0	0	0	0	1	0	1	0	1	6	6	2	2	0	0	0	0	0	2	0.672205
1	1	0	2	1	0	1	1	2	0	0	37	54	1369	1	0	0	0	0	0	1	0	1	0	1	6	6	2	2	0	0	0	0	0	2	0.6361
1	1	0	2	1	0	1	1	2	0	0	61	54	3721	1	0	0	0	0	0	1	0	1	0	1	6	6	2	2	0	0	0	0	0	1	0.497208
0	2	0	1	0	1	1	1	1	1	0	26	55	676	1	1	0	1	0	0					2	4	6	1	1	0	0	0	0	1	1
0	1	0	2	1	1	1	0	1	1	0	4	56	16	1	0	1	0	0	1	1	1	1	0	1	1	5	2	2	1	0	0	0	0	1	0.72033
0	1	0	2	1	1	1	0	1	1	0	7	56	49	1	0	1	0	0	1	1	1	1	0	1	1	5	2	2	1	0	0	0	0	1	0.526966
0	1	0	2	1	1	1	1	1	0	0	13	56	169	1	0	1	0	0	1	1	1	1	0	1	1	5	2	2	1	0	0	0	0	2	0.597302
0	1	0	2	1	1	1	1	1	0		28	56	784	1	0	1	0	0	1	1	1	1	0	1	1	5	2	2	1	0	0	0	0	1	0.550955
0	1	0	2	1	1	1	1	2	0	0	37	56	1369	1	0	1	0	0	1	1	1	1	0	1	1	5	2	2	1	0	0	0	0	1	0.718582
0	1	0	2	1	1	1	1	2	0	0	60	56	3600	1	0	1	0	0	1	1	1	1	0	1	1	5	2	2	1	0	0	0	0	2	0.424738
0	1	1	1	0	0	1	0	1	0	0	13	57	169	1	0	1	0	0	0	1	0	1	0	1	1	7	2	2	1	0	0	0	0	2	0.888226
0	1	1	1	0	0	1	1	1	0		28	57	784	1	0	1	0	0	0	1	0	1	0	1	1	7	2	2	1	0	0	0	0	2	0.547536
0	1	1	1	0	0	1	1	2	0	0	37	57	1369	1	0	1	0	0	0	1	0	1	0	1	1	7	2	2	1	0	0	0	0	2	0.38027
0	1	1	1	0	0	1	1	2	1	0	61	57	3721	1	0	1	0	0	0	1	0	1	0	1	1	7	2	2	1	0	0	0	0	2	0.470408
0	1	1		1	1	2	0	1	0	0	8	58	64	1	0	0	0	0	0	1	1	1	0	2	2	3	2	2	1	0	0	1	1	0
0	1	1		1	1	2	1	1	0		16	58	256	1	0	0	0	0	0	1	1	1	0	2	2	3	2	2	1	0	0	0	0	2	0.651476
0	1	1		1	1	2	1	1	0	0	26	58	676	1	0	0	0	0	0	1	1	1	0	2	2	3	2	2	1	0	0	0	0	2	0.530427
0	1	1		1	1	2	1	2	0	0	60	58	3600	1	0	0	0	1	0	1	1	1	0	2	2	3	2	2	1	1	0	0	0	2	0.337368
0	2	1	1	0	0	1	0	1	1	0	3	59	9	1	0	1	0	0	0	1	0	1	0	2	1	6	2	1	1	0	0	0	1	0
0	2	1	1	0	0	1	0	1	1	0	7	59	49	1	0	1	0	0	0	1	0	1	0	2	1	6	2	1	1	0	0	0	1	0	0.625399
0	2	1	1	0	0	1	0	1	0	0	13	59	169	1	0	1	0	0	0	1	0	1	0	2	1	6	2	1	1	0	0	0	0	2	0.526706
0	2	1	1	0	0	1	0	1	1	0	36	59	1296	1	0	1	0	0	0	1	0	1	0	2	1	6	2	1	1	0	0	0	0	1	0.511982
0	2	1	1	0	0	1	1	1	1	0	60	59	3600	1	0	1	0	0	0	1	0	1	0	2	1	6	2	1	1	0	0	1	1	1	0.411028
1	1	1	1	0	1	1	1	1	0	0	25	60	625	2	0	0		0	0	1	0	1	1	1	3	3	1	2	0	0	0	0	0	1
